# Supplementary material for: Effect of physical training on airway inflammation in animal models of asthma: a systematic review
Source: PubMed Central journal article supplement (PMC3691924; doi:10.1186/1471-2466-13-24), 2013-04-24
Supplement: 1471-2466-13-24-S1.pdf [file 1471-2466-13-24-S1.pdf]

Summary of included studies

| Source              | Number of subjects | Animal                                                                                              | Asthma model                                                                                                                                                                            | Study design | Intervention                                                                                                                                                        | Outcomes                                                                                                                                                                                                                                                                                                                                                     |
|---------------------|--------------------|-----------------------------------------------------------------------------------------------------|-----------------------------------------------------------------------------------------------------------------------------------------------------------------------------------------|--------------|---------------------------------------------------------------------------------------------------------------------------------------------------------------------|--------------------------------------------------------------------------------------------------------------------------------------------------------------------------------------------------------------------------------------------------------------------------------------------------------------------------------------------------------------|
| Dugger et al. 2010  | unknown            | BALB/c with CD4+ Thy1.2+ cell from the DO11.10-T <sup>LUX</sup> model<br>sex unknown<br>age unknown | “OVA sensitization/challenge”                                                                                                                                                           | CT           | Treadmill at 13.5 m/min , 0% grade (no other information stated)                                                                                                    | -T helper cell CCR7, CCR8, CXCR3, and CCR4 expression, function, and migration in/out of the lung                                                                                                                                                                                                                                                            |
| Hewitt et al., 2010 | 8-16               | BALB/cJ females<br>age 3 – 5 weeks                                                                  | OVA-alum IP days 0, 14; then aerosolized OVA (concentration unclear) days 21 – 25 & day 28                                                                                              | CT           | Treadmill 45 – 60 min 3x/week for 4 weeks at 13.5 m/min, 0% grade; in addition, 15 min total warm-up/cool-down per session. Started 1h post OVA treatment on day 28 | -serum epinephrine<br>-BAL: PGE <sub>2</sub><br>-lung histology: airway smooth muscle thickness<br>-ex-vivo airway smooth muscle cells analyzed for β <sub>2</sub> AR, GRK-2, EP1<br>-airway resistance to increasing amounts of methacholine                                                                                                                |
| Lowder et al., 2010 | 6-12               | C.Cg-Foxp3 <sup>tm2Tch</sup> /J reporter on BALB/cJ background females<br>age 5 – 6 weeks           | OVA-alum 50 mcg days 0, 14; then aerosolized OVA at 5 mg/mL 30 min/day x 5 days for day 21 – 25, then 10 min 3 days/week for the remainder                                              | RCT          | Treadmill for 45 min 3x/wk for 4 wks at 10 – 13.5 m/min, 0% grade. Started 1h post-OVA on day 28                                                                    | -BAL: total cells, differential<br>-Lung flow cytometry for % Foxp3+ cells<br>-in vitro suppression of effector cell proliferation by CD4+CD25+Foxp3+ cells from the lungs, mediastinal lymph nodes, spleen<br>-in vitro levels of lung/spleen Il-4, Il-5, TGF-β, Il-10, Il-17 in the supernatants of spleen cultures at an effector:suppressor ratio of 1:1 |
| Pastva et al., 2005 | 10-12              | BALB/cJ females<br>age 3 – 5 weeks                                                                  | OVA 50 mcg IP days 0, 14; then aerosolized OVA at 5 mg/mL for 30 min/day x 5 days starting day 21, thereafter boosters of aerosolized OVA at the same concentration 10 min/day 5days/wk | RCT          | Treadmill: 1 <sup>st</sup> week 10m/min x 30 min 3x/wk, thereafter 45 min at 13.5 m/min 0% grade 3x/week for 3 weeks; in addition 15 min total warm-                | -BAL: total cells, eosinophils, CXC chemokine KC, VCAM-1<br>-lung immunofluorescence: NF-κB DNA binding activity, NF-κB nuclear translocation                                                                                                                                                                                                                |

|                     |       |                                       |                                                                                                                                              |     |                                                                                                                                                                                                                                          |                                                                                                                                                                                                                                                                                                                                                                  |
|---------------------|-------|---------------------------------------|----------------------------------------------------------------------------------------------------------------------------------------------|-----|------------------------------------------------------------------------------------------------------------------------------------------------------------------------------------------------------------------------------------------|------------------------------------------------------------------------------------------------------------------------------------------------------------------------------------------------------------------------------------------------------------------------------------------------------------------------------------------------------------------|
|                     |       |                                       |                                                                                                                                              |     | up/cool-down.<br>Started 1-2h post<br>OVA on day 28.                                                                                                                                                                                     |                                                                                                                                                                                                                                                                                                                                                                  |
| Pastva et al., 2004 | 10-18 | BALB/cJ<br>females<br>age 3 – 5 weeks | OVA- alum 50 mcg IP<br>days 0, 14; then<br>aerosolized OVA<br>5mg/mL starting day<br>21 for 30min/day x<br>5days, then 10min/day<br>5days/wk | RCT | Treadmill for 45<br>min 3x/wk for 4<br>weeks at 10<br>m/min 0% grade<br>x 2 weeks, then<br>13.5m/min 0%<br>grade x 2 weeks;<br>in addition, 15<br>min total of<br>warm-up/cool<br>down per session.<br>Started 2h post<br>OVA on day 28. | -serum: total IgE ,<br>OVA-specific IgE<br>-BAL: total cells,<br>differential, total<br>protein, KC, MCP-1,<br>RANTES, Il-4, Il-5<br>-lung histology :<br>peribronchial<br>lymphocytes,<br>perivascular<br>lymphocytes, epithelial<br>hypertrophy, goblet<br>cells/mucin, index of<br>inflammation,<br>immunohistochemistry<br>for VCAM-1, NF-κB<br>p65          |
| Silva et al., 2010  | 14    | BALB/c<br>males<br>age 4 weeks        | OVA-alum 10 mcg IP<br>days 0, 14, 28, 42; then<br>1% aerosolized OVA<br>starting day 21 for 30<br>min 3x/week until day<br>54                | CT  | Treadmill for 60<br>min 5x/wk for 4<br>weeks at 50%<br>max speed based<br>on a maximal<br>exercise capacity<br>test. Started day<br>28                                                                                                   | -serum IgE and IgG <sub>1</sub><br>-peribronchial histology:<br>eosinophils , mucous<br>production, airway<br>smooth muscle<br>thickness, airway<br>collagen deposition,<br>airway elastic fiber<br>deposition<br>-peribronchial<br>immunohistochemistry:;<br>CD3+ T cells, CD4+ T<br>cells, Il-4, Il-5, Il-13, Il-<br>2, IFN-γ, Fox p3, Il-10,<br>Il-1ra, NF-κB |
| Vieira et al., 2011 | 16    | BALB/c<br>males<br>age unclear        | OVA-alum 20 mcg IP<br>days 0, 14, 28, 42; then<br>1% aerosolized OVA<br>starting at day 21<br>3x/week until day 50                           | CT  | Treadmill for 60<br>min 5 x/week for<br>4 weeks at 50%<br>max speed based<br>on a maximal<br>exercise capacity<br>test. Started 1 day<br>post first OVA<br>aerosolization.                                                               | -BAL: total cells,<br>eosinophils, epithelial<br>cells<br>-airway tissue histology:<br>goblet cells, neutral<br>mucin , ciliated cells<br>-airway<br>immunohistochemistry:<br>Il-13, Il-14, Il-5,<br>VCAM-1, CCL11,<br>CCL5, ICAM-1, eNOS,<br>nNOS, iNOS, Il-2, IFN-<br>γ, NF-κB , Il-10, SOD1,<br>SOD2, GPX,                                                    |

|                     |    |                             |                                                                                                                                                                                                        |    |                                                                                                                                                  |                                                                                                                                                                                                                                                                                                                                                                                                                                      |
|---------------------|----|-----------------------------|--------------------------------------------------------------------------------------------------------------------------------------------------------------------------------------------------------|----|--------------------------------------------------------------------------------------------------------------------------------------------------|--------------------------------------------------------------------------------------------------------------------------------------------------------------------------------------------------------------------------------------------------------------------------------------------------------------------------------------------------------------------------------------------------------------------------------------|
|                     |    |                             |                                                                                                                                                                                                        |    |                                                                                                                                                  | GP91phox, 3-<br>Nitrotyrosine, 8-<br>Isoprostane, IGF-1,<br>EGFr, VEGF, TGF- $\beta$ ,<br>MMP-12, TIMP-1,<br>TIMP-2, MMP-9,<br>P2X7R                                                                                                                                                                                                                                                                                                 |
| Vieira et al., 2009 | 16 | BALB/c males<br>age unclear | OVA-alum 10 mcg IP days 0, 14, 28, 42; then 1% aerosolized OVA starting day 21 for 30 min 3x/wk up to day 53 Both groups also given oral creatine supplementation (0.5g/kg 5x/week from day 21 to 53). | CT | Treadmill for 60 min 5x/week for 4 wks at 50% max speed based on a maximal exercise capacity test. Started 1 day post first OVA aerosolization.  | -BAL: total cell count, differential<br>-airway histology: peribronchial density of eosinophils, airway volume proportion of collagen & elastic fibres, airway smooth muscle index, bronchoconstriction index<br>-airway immunohistochemistry: Il-4, Il-5, Il-2, IFN- $\gamma$ , Il-10                                                                                                                                               |
| Vieira et al., 2008 | 16 | BALB/c males<br>age unclear | OVA -alum 20 mcg IP days 0, 14, 28, 42; then 1% aerosolized OVA 3x/week days 21 - 50                                                                                                                   | CT | Treadmill for 60 min 5 x/week for 4 weeks at 75% max speed based on baseline maximal exercise test. Started 1 day post first OVA aerosolization. | -lung histology: perivascular eosinophils & mononuclear cells, parenchymal eosinophils & mononuclear cells, volume proportion of elastic & collagen fibres in the artery wall and in lung parenchyma<br>-lung immunochemistry: perivascular expression of Il-4, Il-5, Il-2, IFN- $\gamma$ , MCP-1, IGF-1, Il-10, NF- $\kappa$ B p65, parenchymal expression of Il-4, Il-5, Il-2, IFN- $\gamma$ , MCP-1, IGF-1, Il-10, NF- $\kappa$ B |
| Vieira et al., 2007 | 16 | BALB/c males<br>age unclear | OVA-alum 20 mcg IP days 0, 14, 28, 42; then 1% aerosolized OVA 3x/week days 21 - 50                                                                                                                    | CT | Treadmill for 60 min 5 x/week for 4 weeks at 50% max speed based on baseline maximal exercise test. Started 1 day post first OVA aerosolization. | -serum IgE, IgG1 titres<br>-BAL : total cell count, eosinophils, PMNs, mononuclear cells<br>-airway histology: peribronchial density of mononuclear cells, eosinophils , volume proportion of collagen,                                                                                                                                                                                                                              |

|  |  |  |  |  |  |                                                                                                                                                             |
|--|--|--|--|--|--|-------------------------------------------------------------------------------------------------------------------------------------------------------------|
|  |  |  |  |  |  | elastic fibres , smooth muscle area, epithelial thickness, bronchoconstriction index<br>-airway immunohistochemistry: Il-4, Il-5,Il-2, Il-10, IFN- $\gamma$ |
|--|--|--|--|--|--|-------------------------------------------------------------------------------------------------------------------------------------------------------------|

BALB : Bagg Albino (inbred research mouse strain), OVA : ovalbumin, CT : controlled trial, CCR : chemokine (C-C motif) receptor, CXCR : CXC chemokine receptor, alum : aluminum hydroxide, IP : intraperitoneal, BAL : bronchoalveolar lavage, PGE<sub>2</sub> : prostaglandin E2,  $\beta$ 2AR : beta-2 adrenergic receptor, GRK2 : G-protein receptor kinase 2, EP1 : E prostanoid-1 receptor, Treg : regulatory T cell-specific transcription factor, RCT : randomized controlled trial, CD : cluster of differentiation, Il : interleukin, TGF $\beta$  : transforming growth factor-beta, KC : keratinocyte chemoattractant, VCAM-1 : vascular cell adhesion molecule-1, NF- $\kappa$ B p65 : a subunit of the nuclear factor-kappa B transcription complex, IgE : immunoglobulin E, MCP-1 : monocyte chemotactic protein-1, RANTES : regulated upon activation normal T cell expressed and secreted, IgG1 : immunoglobulin G1, CCL : chemokine (C-C motif) ligand, ICAM-1 : intercellular adhesion molecule-1, eNOS : endothelial nitric oxide synthase, nNOS : neuronal nitric oxide synthase, iNOS : inducible nitric oxide synthase, IFN- $\gamma$  : interferon-gamma , SOD1 : superoxide dismutase-1, GPX : glutathione
